# Supplementary material for: Determination of the Antioxidant Activity of Samples of Tea and Commercial Sources of Vitamin C, Using an Enzymatic Biosensor
Source: MDPI journal article supplement (doi:10.3390/antiox10020324), 2021-02-22
Supplement: s1 [file s1]

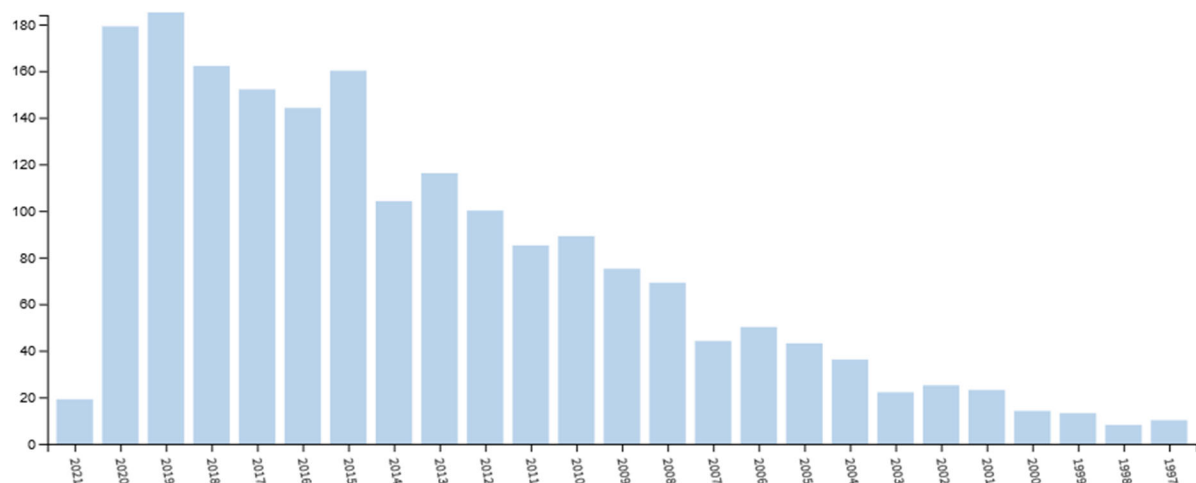

Figure 1. Distribution of the references concerning antioxidant capacity detection, according with publication years – since 1997

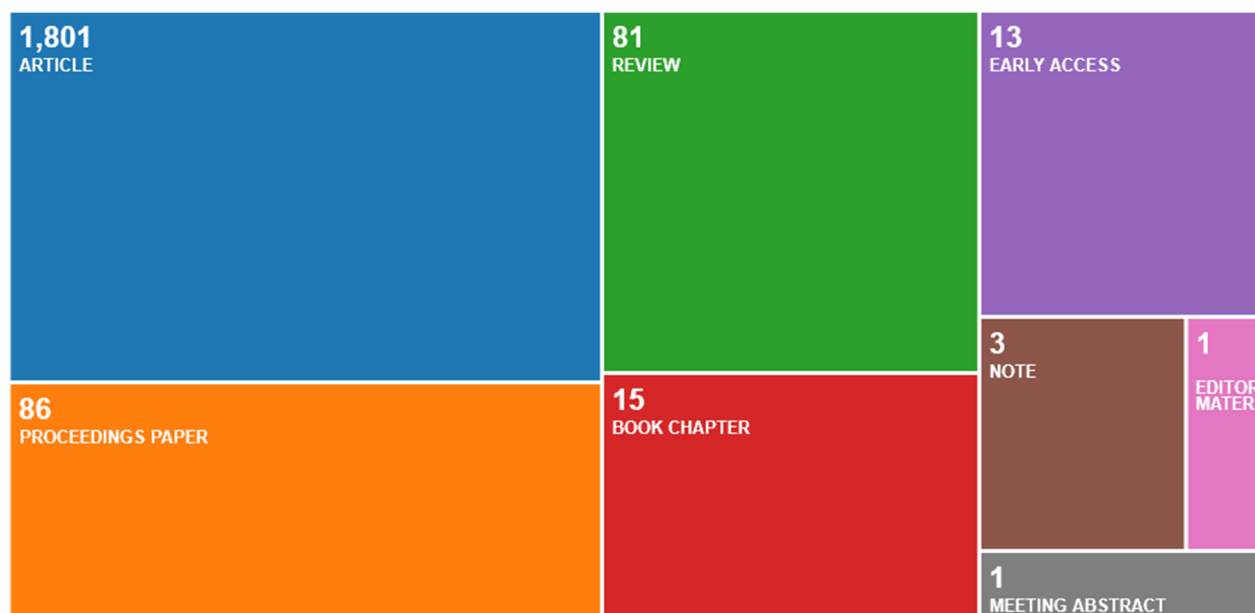

Figure 2. Distribution of the references concerning antioxidant capacity detection, according with document type – since 1997

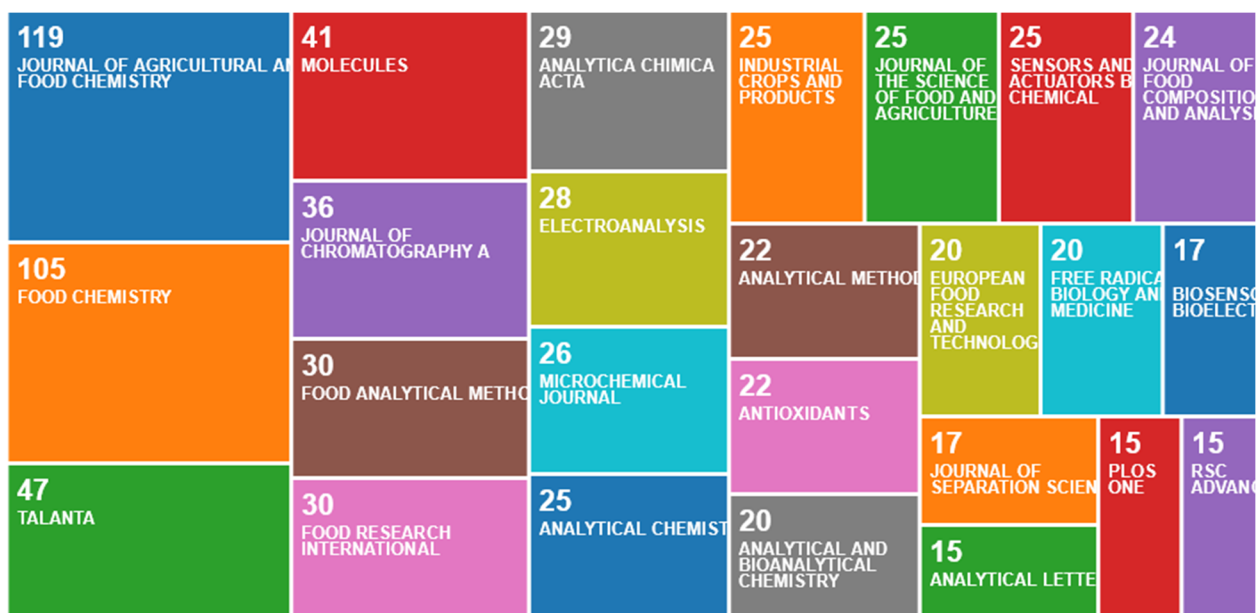

Figure 3. Distribution of the references concerning antioxidant capacity detection, according with source titles – since 1997

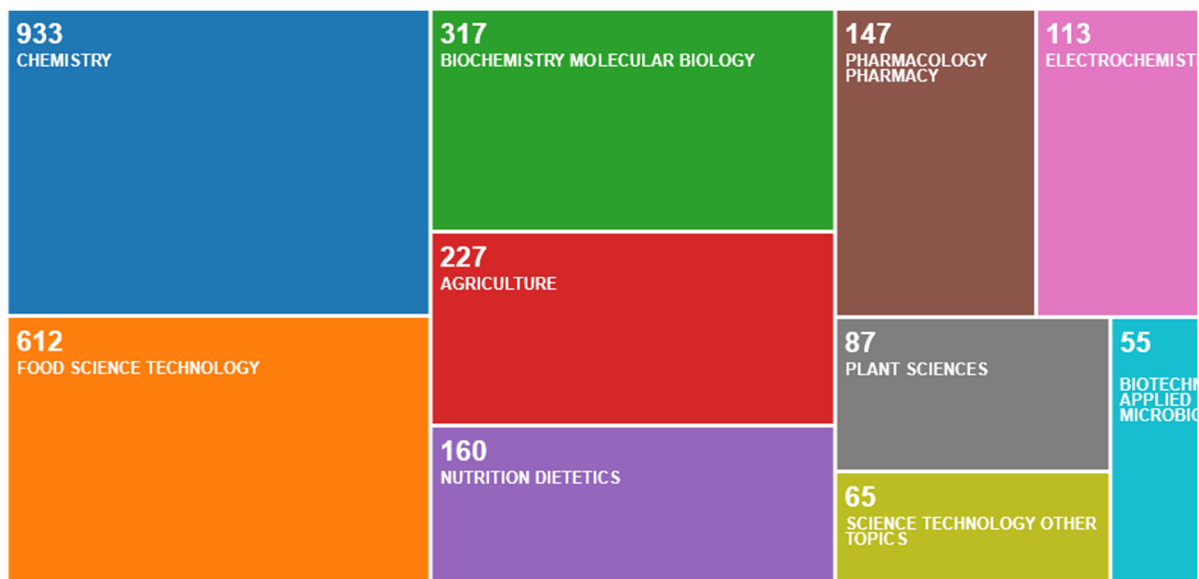

Figure 4. Distribution of the references concerning antioxidant capacity detection, according research area – since 1997

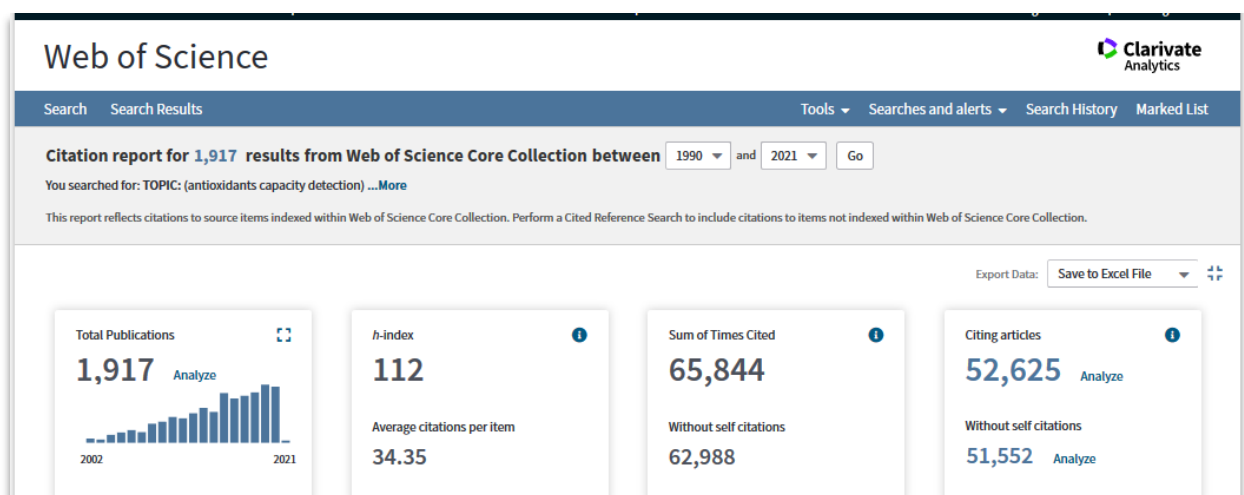

Figure 5. H-index related to the ISI WOS references dealing with antioxidant capacity detection – since 1997
